# Supplementary material for: The complement receptor 3 (CD11b/CD18) agonist Leukadherin‐1 suppresses human innate inflammatory signalling
Source: PubMed Central journal article supplement (PMC4991522; doi:10.1111/cei.12803), 2016-07-26

## SUPPLEMENTARY MATERIAL

**Supplementary Figure 1:** The effect of Leukadherin-1 on inflammatory cytokine secretion by Fc-receptor engaged NK cells.

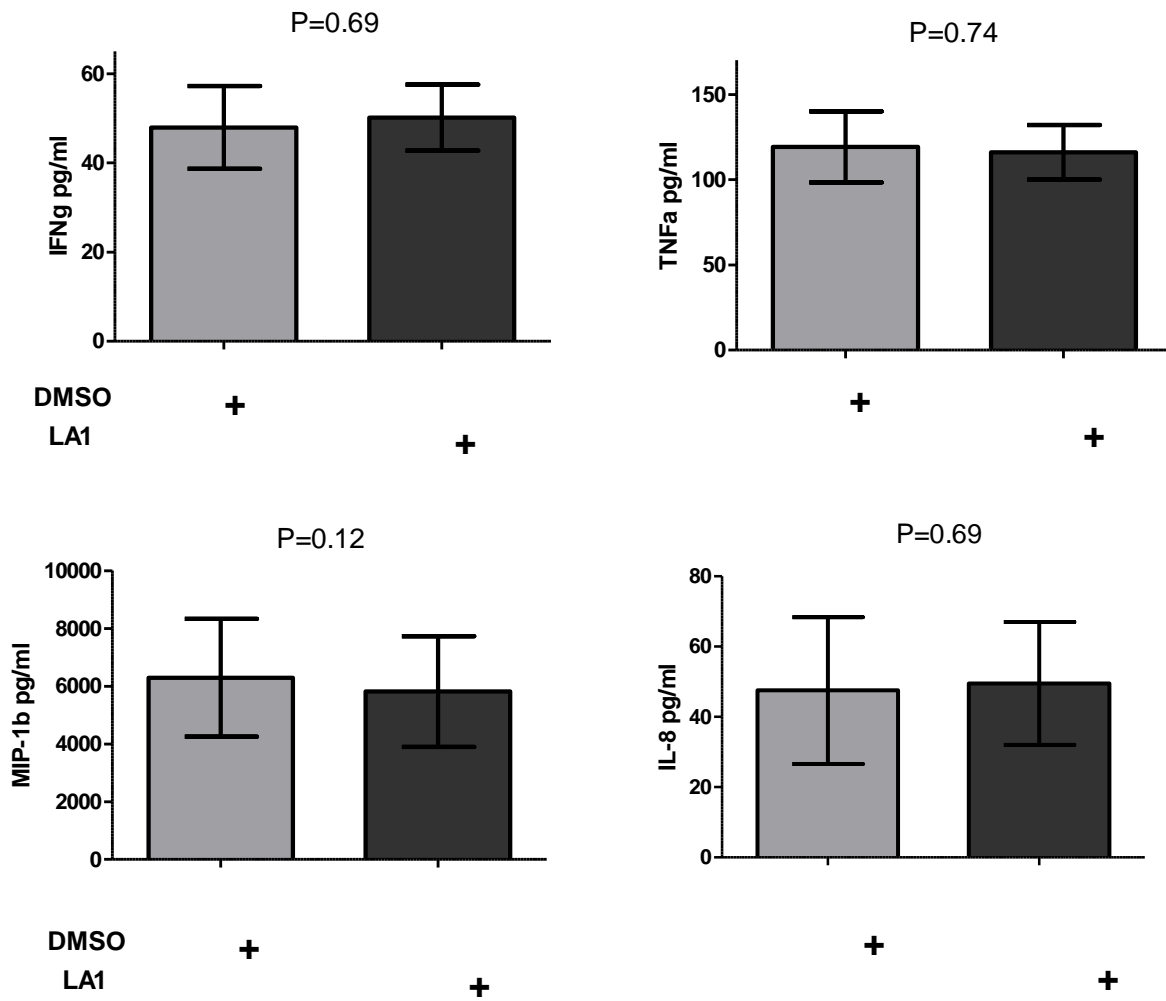

Cells were pretreated with Leukadherin-1 (LA1) and stimulated using IgG coated polystyrene particles (N=12). DMSO provides the vector control for Leukadherin-1. Data presented are mean  $\pm$  standard error of the supernatant cytokine concentration at 24 hours. Statistical testing by 2-tailed paired t-test.

**Supplementary Table 1:** The effect of Syk blockade on cytokine secretion by stimulated, Leukadherin-1 treated NK cells.

| Secreted Cytokine | LA1 + IL-12 + IL-15 stimulated (N=6)   |         | LA1 + IL-12 + IL-18 stimulated (N=5)   |         |
|-------------------|----------------------------------------|---------|----------------------------------------|---------|
|                   | Mean Change with syk inhibitor (pg/ml) | p-value | Mean Change with syk inhibitor (pg/ml) | p-value |
| IFN- $\gamma$     | -1170 (400)                            | 0.043   | -264 (2594)                            | 0.92    |
| TNF               | -43 (17)                               | 0.052   | -59 (18)                               | 0.0046  |
| MIP-1 $\beta$     | -6810 (1050)                           | 0.0029  | -1884 (474)                            | 0.029   |
| IL-8              | -106 (57)                              | 0.12    | -21 (6.7)                              | 0.033   |

The mean (standard error) change in cytokine secretion consequent upon anti-Syk treatment, when compared with the reduced cytokine secretion already observed (figure 1) following treatment with Leukadherin-1 (LA1). Leukadherin-1 + IL-12 + IL-15 stimulation (left) or Leukadherin-1 + IL-12 + IL-18 stimulation (right). Statistics by 2-tailed paired t test.

**Supplementary Figure 2: The effect of Leukadherin-1 on Syk phosphorylation**

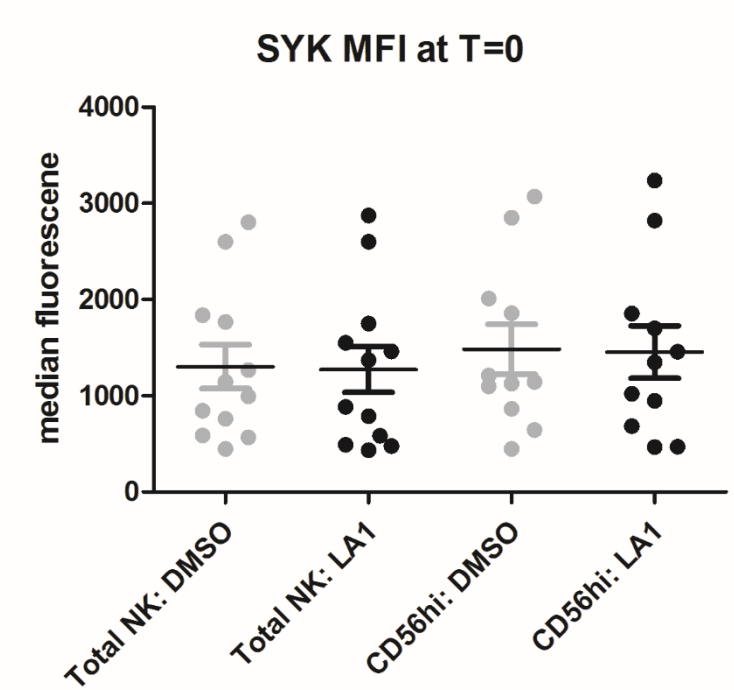

Cells were incubated with either Leukadherin-1 (LA1) or DMSO for 30 minutes (N=12). DMSO provides the vector control for Leukadherin-1. Cells were permeabilised and stained with Alexa647 anti-pSyk. Data presented are mean +/- standard error of the median fluorescence of pSyk. Statistical testing by 2-tailed paired t-test.

**Supplementary Figure 3:** The effect of IL-10 receptor blocking antibodies on IL-12+IL-15- and IL-12+IL-18-stimulated NK cell cytokine secretion

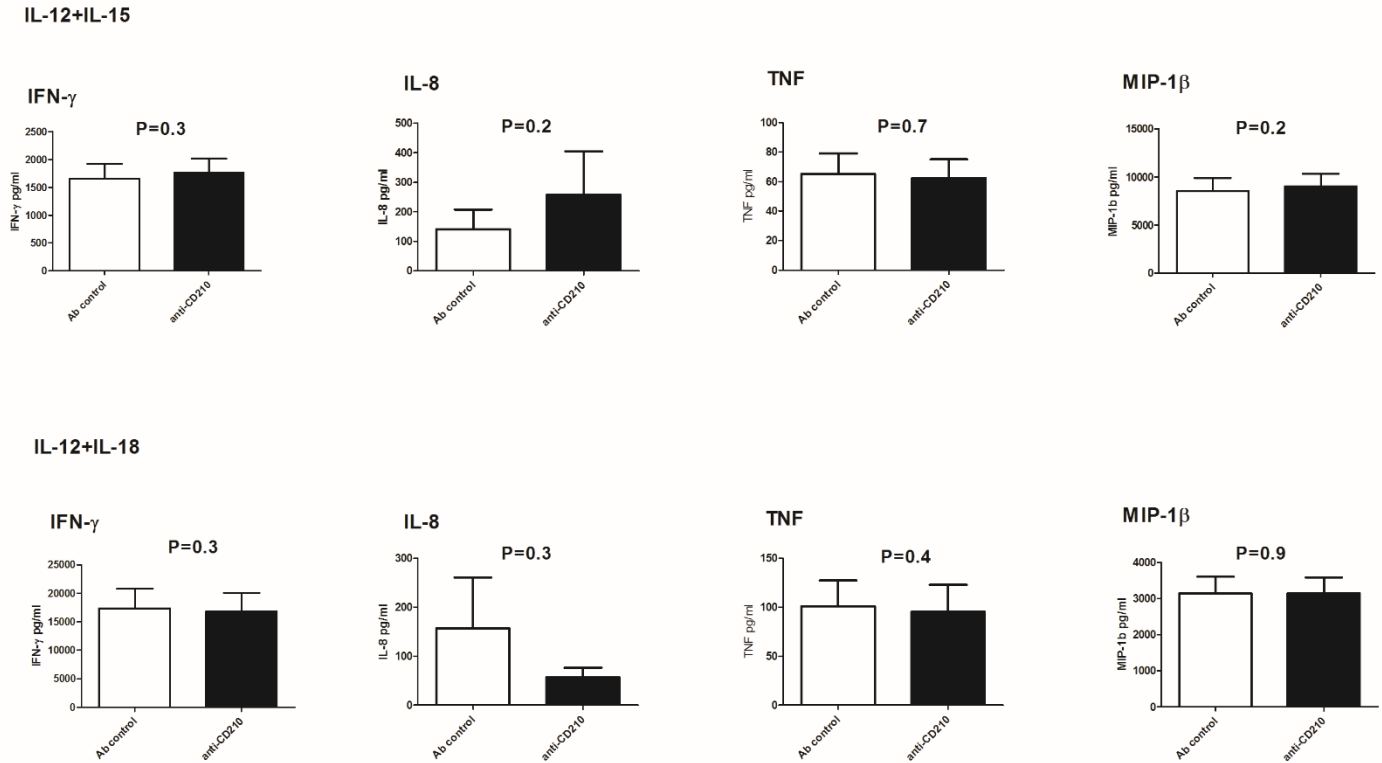

NK cells were incubated with anti-CD210 antibody or isotype control together with IL-12+IL-15 (top panel) or IL12-IL-18 (bottom panel). Data presented are mean +/- standard error of the supernatant cytokine concentration at 24 hours. Statistical testing by 2-tailed paired t-test.

**Supplementary Figure 4:** The effect of Leukadherin-1 on in p38, ERK, STAT3 phosphorylation

A) Heat map (log<sub>2</sub> median fold-change) of effects of Leukadherin-1 pre-treatment on pSTAT43, p-p38, pERK and pSTAT5 following NK cell stimulation with IL-12+IL-18 (top panel) and IL-12+IL-15 (lower panel) in total NK cells (left panel) and CD56hi (right panel) across multiple time points. Three to nine samples per time point.

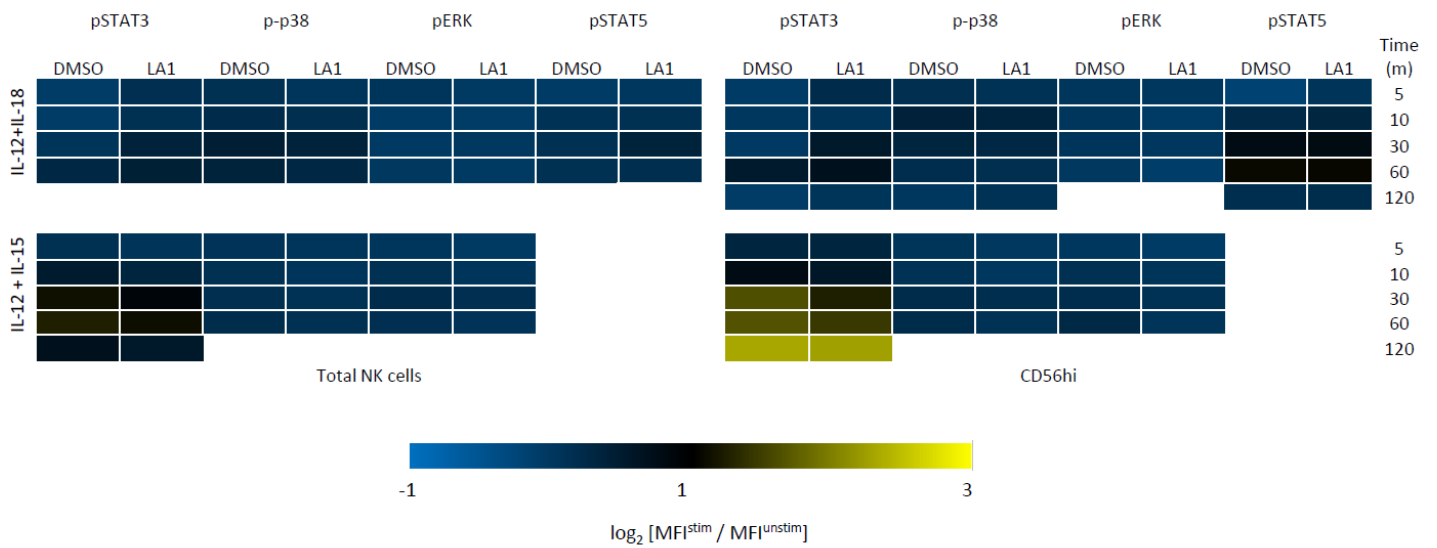

Supplement: CEI-185-361-s001.pdf [file CEI-185-361-s001.pdf]
